# Supplementary material
Source: publisher site journal article supplement (https://www.dovepress.com/article/410703)
Supplement: Supplementary file 1 [file get_supplementary_file.php]

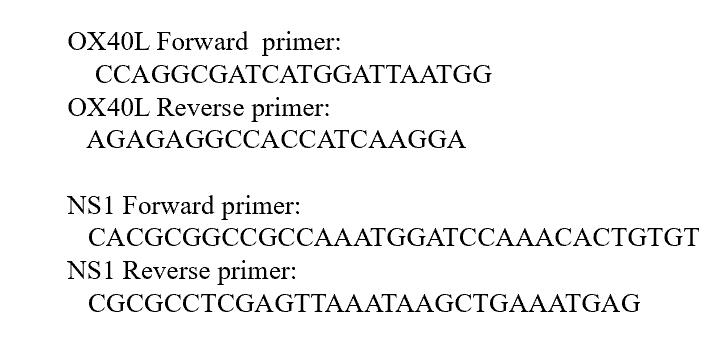


**Figure S1** Primer sequences for OX40L and the influenza A virus NS universal primer.


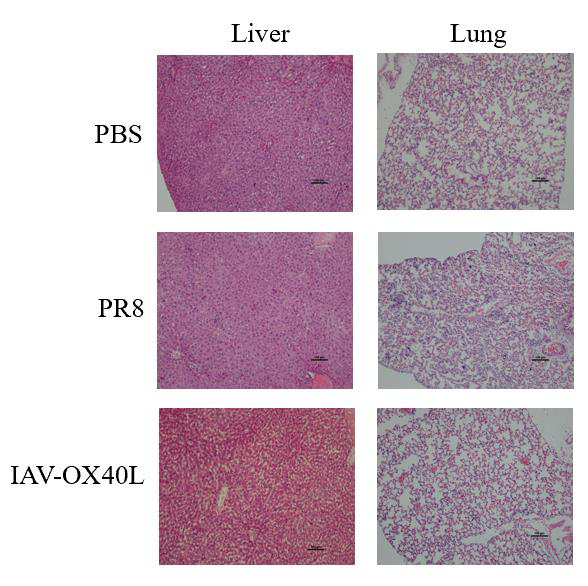


**Figure S2** Liver and lung tissue pathology was obtained 14 days after the last inoculation in mice.
